# Supplementary material
Source: PubMed Central journal article supplement (PMC2265114)
Supplement: pnas_0710412105_5.pdf [file pnas_0710412105_5.pdf]

Table 2. Strain used in this study

| <i>Strain</i> | <i>Genotype</i>                                                                                          | <i>Source</i> |
|---------------|----------------------------------------------------------------------------------------------------------|---------------|
| W303-1A       | <i>MATa leu2-3, 112 his3-11, 15 ade2-1 ura3-1 trp1-1 can1-100)</i>                                       | <i>Ref. 1</i> |
| TN-1          | W303-1A <i>ura3-1::GalE leu2-3::UGT2 trp1-1::ScMNN9-ppGalNAc-T1</i>                                      | This study    |
| TN-2          | W303-1A <i>ura3-1::GalE leu2-3::UGT2 trp1-1::ScMNN9-ppGalNAc-T2</i>                                      | This study    |
| TN-3          | W303-1A <i>ura3-1::GalE leu2-3::UGT2 trp1-1::ScMNN9-ppGalNAc-T3</i>                                      | This study    |
| T-1           | W303-1A <i>ura3-1::GalE leu2-3::UGT2 trp1-1::ScMNN9-ppGalNAc-T1 and ScMNN9-<math>\beta</math>1-3GalT</i> | This study    |
| T-3           | W303-1A <i>ura3-1::GalE leu2-3::UGT2 trp1-1::ScMNN9-ppGalNAc-T3 and ScMNN9-<math>\beta</math>1-3GalT</i> | This study    |
| N-1           | W303-1A <i>ura3-1::GalE leu2-3::UGT2</i>                                                                 | This study    |

1. Thomas BJ, Rothstein R (1989) Genetics 123:725-738.
