# Supplementary material
Source: PubMed Central journal article supplement (PMC2265114)

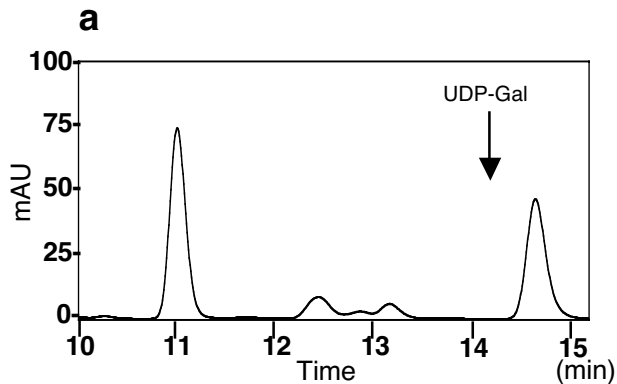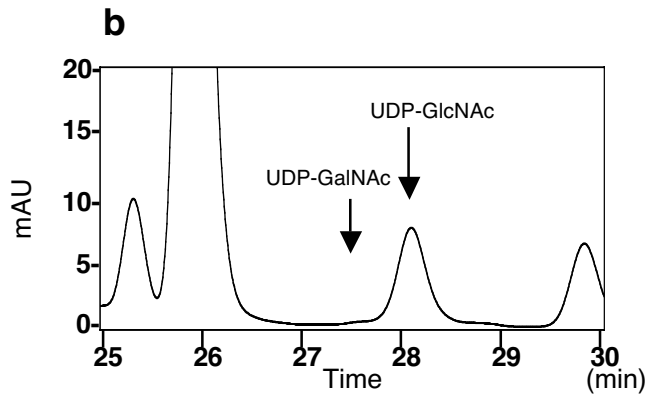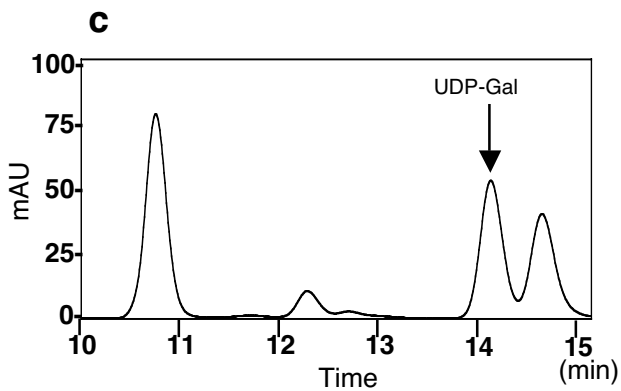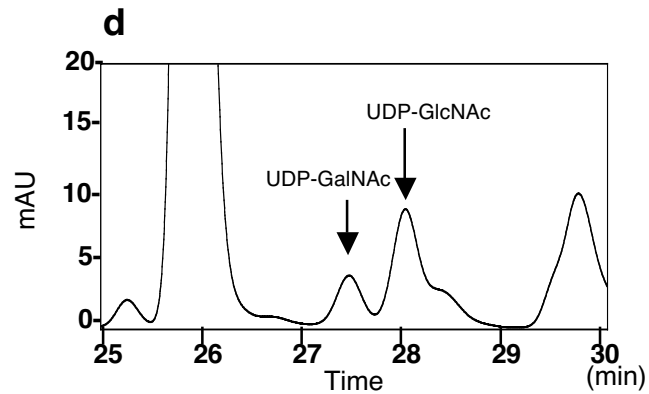

Supplement: pnas_0710412105_1.pdf [file pnas_0710412105_1.pdf]

a: Thr5

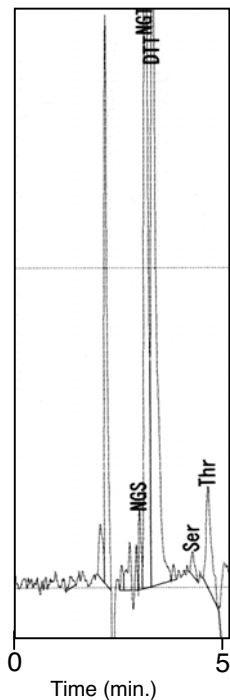

b: Ser6

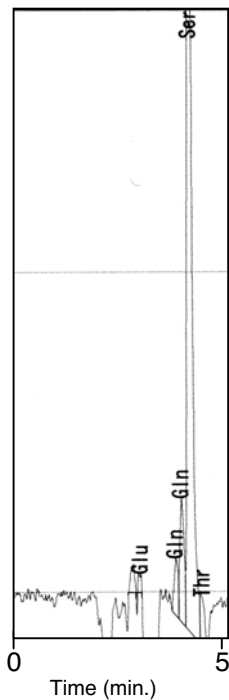

c: Thr10

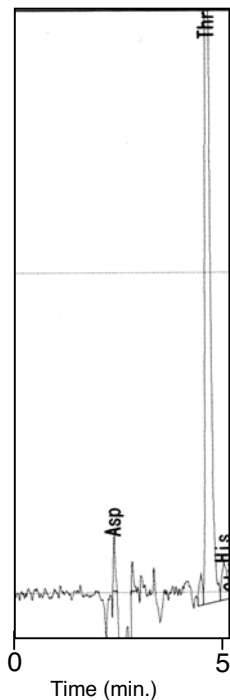

MUC1a, AHGVT<sup>5</sup>S<sup>6</sup>APDT<sup>10</sup>R

Supplement: pnas_0710412105_2.pdf [file pnas_0710412105_2.pdf]

a: Val30

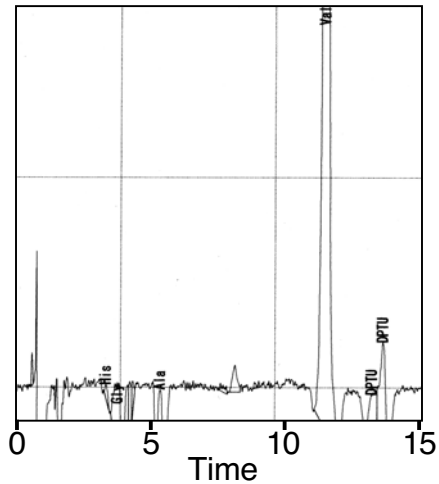

b: Thr31

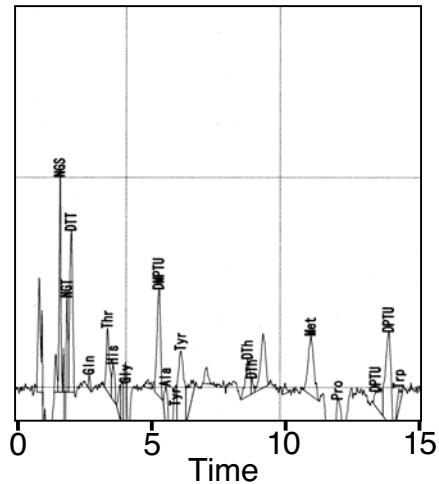

c: Pro32

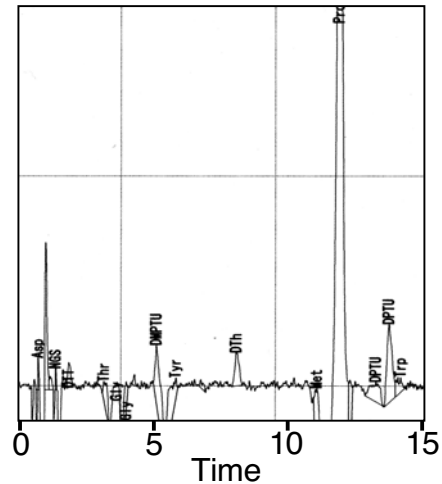

Supplement: pnas_0710412105_3.pdf [file pnas_0710412105_3.pdf]

### hPod/TN-1 and T-1, 200 ng

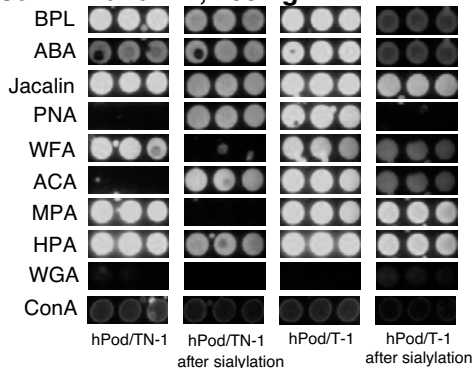

### hPod/TN-3 and T-3, 200 ng

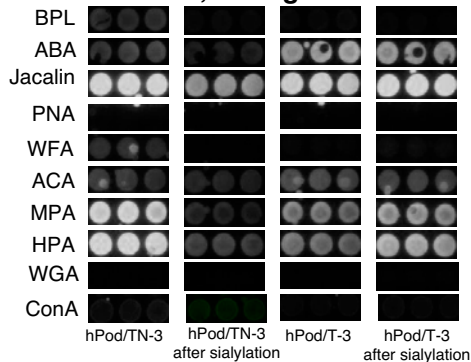

### hPod/TN-1 and T-1, 50 ng

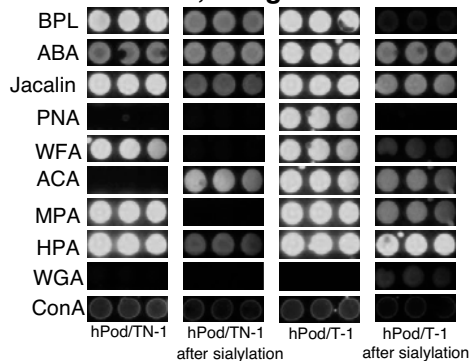

### hPod/TN-3 and T-3, 50 ng

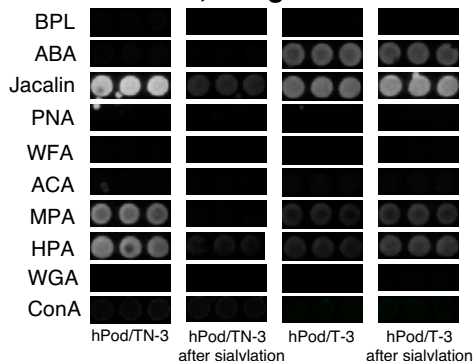

Supplement: pnas_0710412105_4.pdf [file pnas_0710412105_4.pdf]
